# Supplementary figures and images for: Sub-Saharan Africa total diet study in Benin, Cameroon, Mali and Nigeria: Pesticides occurrence in foods
Source: PubMed Central journal article supplement — Food Chem X. 2019 May 23;2:100034. doi: 10.1016/j.fochx.2019.100034 (PMC6694844; doi:10.1016/j.fochx.2019.100034), 2019-05-23

180215OP016 Chlorpyrifos ethyl\*  
F: + c EI SRM ms2 314.000 [257.899-257.901, 285.999-286.001]

RT: 21.25  
AA: 456985216.23  
AH: 99.99  
SN: 716714.15

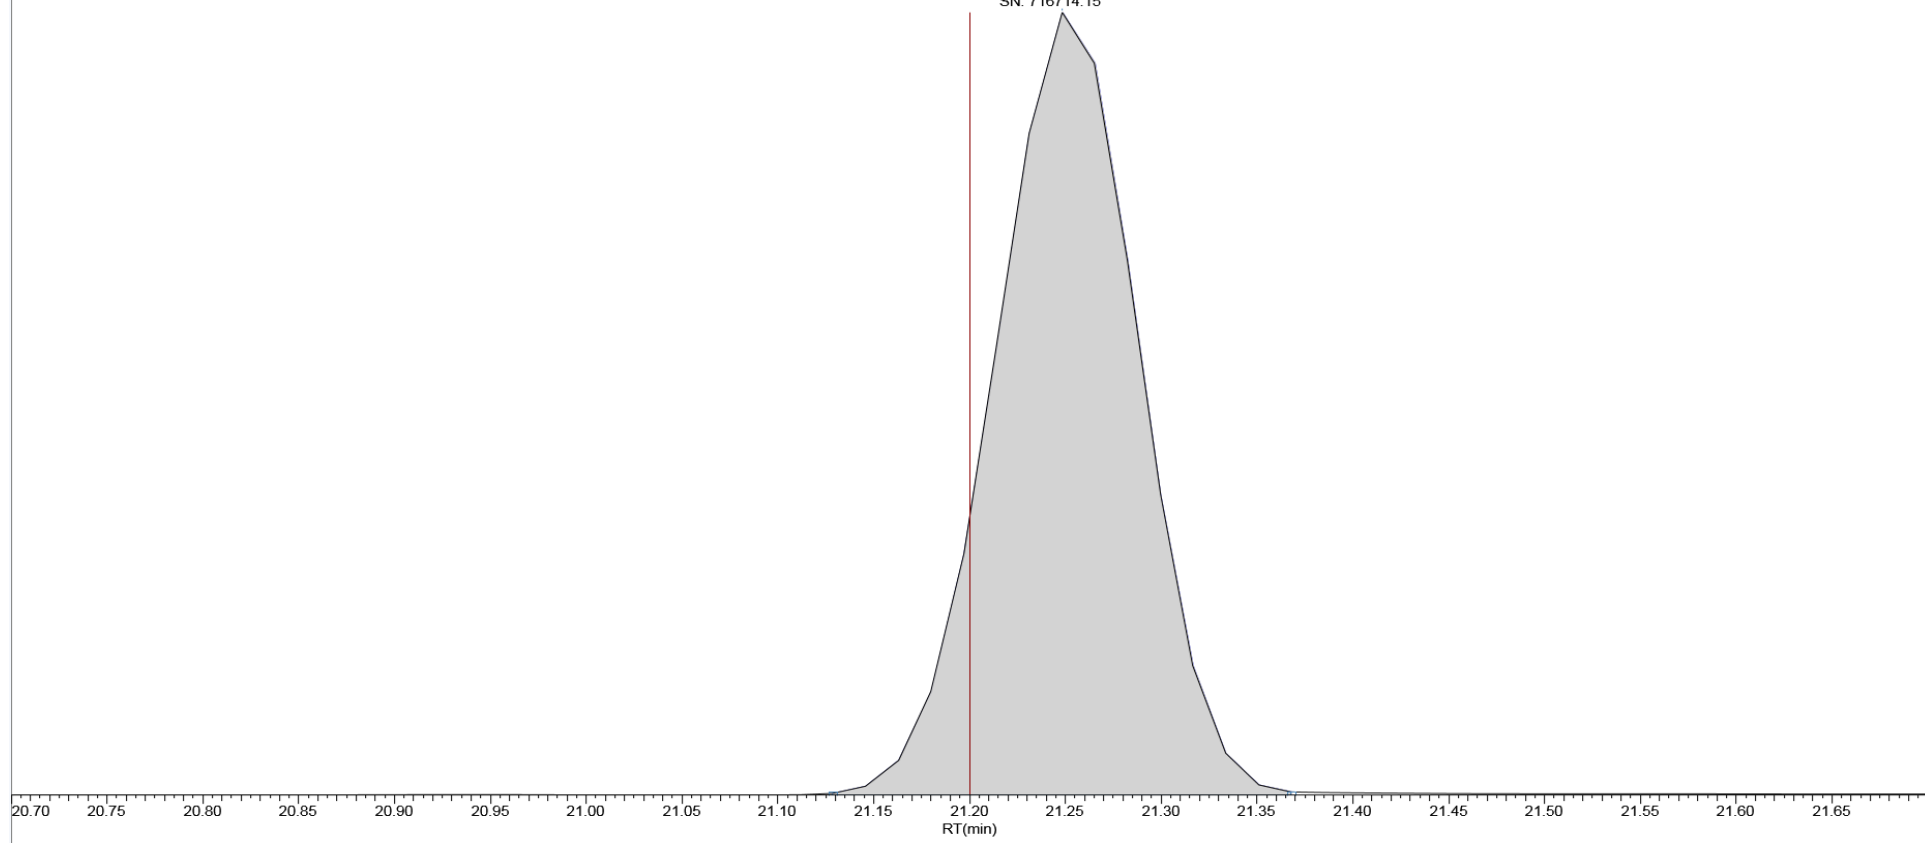

Supplement: mmc1.pdf [file mmc1.pdf]

171226OP028 Profenofos  
F: + c ESI SRM ms2 374.880 [128.099-128.101, 304.899-304.901]

RT: 11.04  
MA: 7490812.03  
MH: 100.00  
SN: 874.48

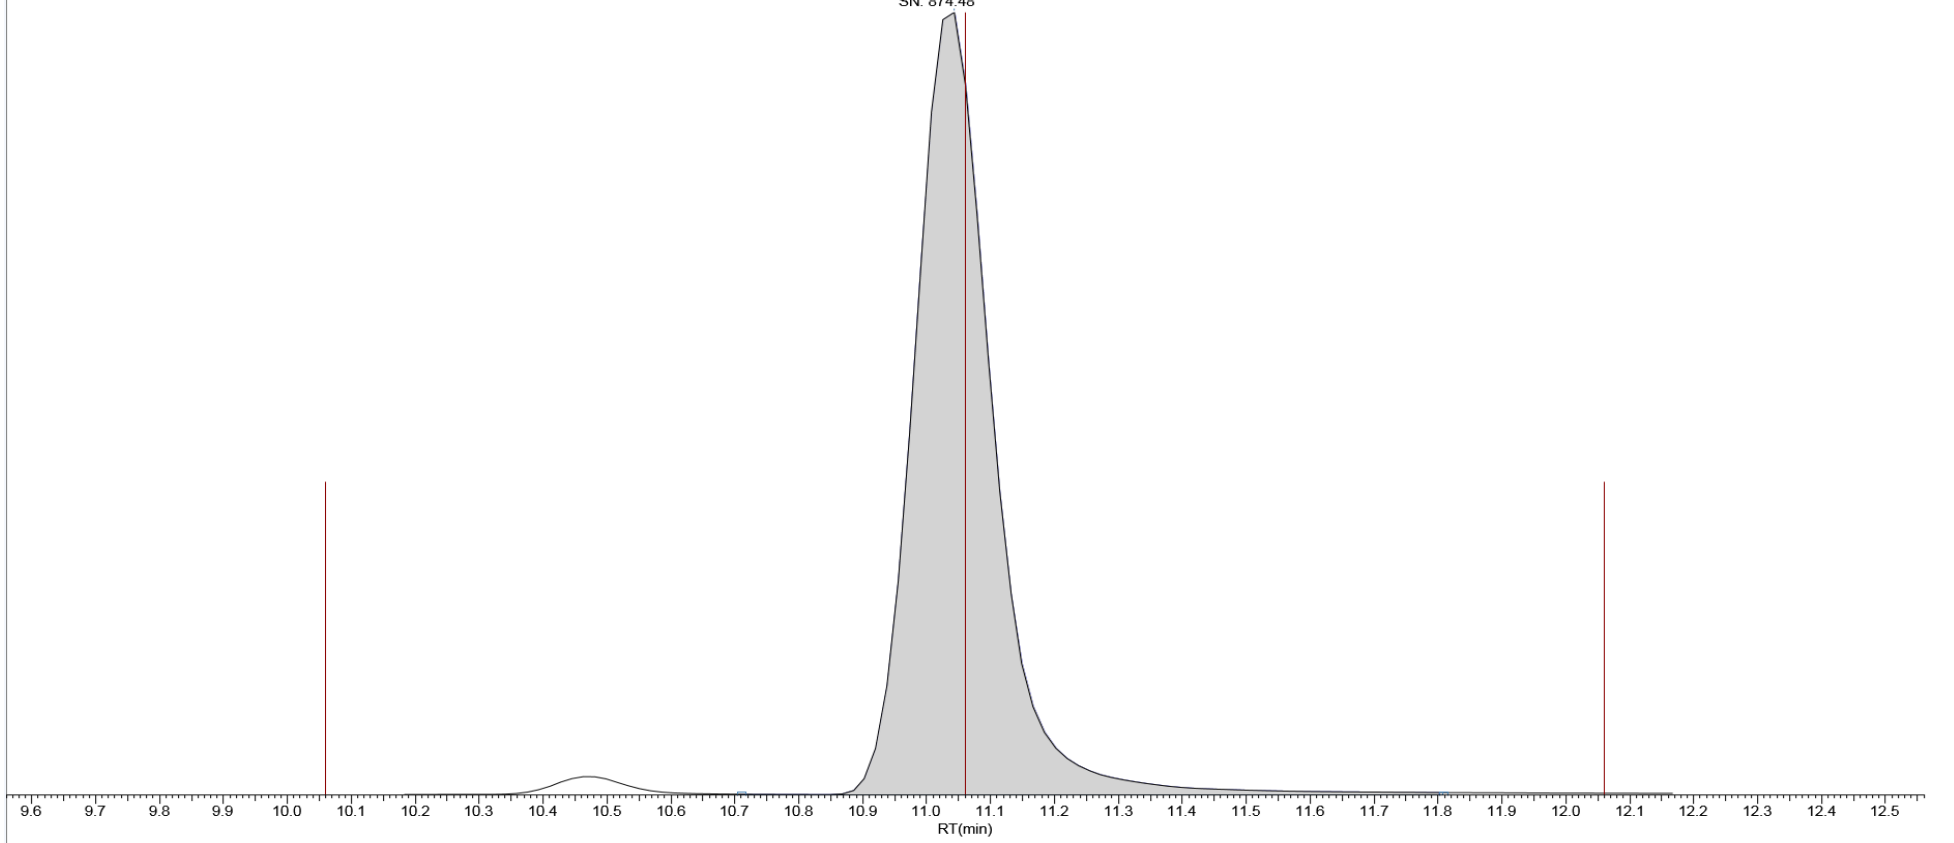

Supplement: mmc2.pdf [file mmc2.pdf]
